# Supplementary material for: Black single crystals of lead-free perovskite Cs2Ag(Bi:Ru)Br6 with an intermediate band
Source: Royal Society of Chemistry journal article supplement (doi:10.1039/d2ma00264g), 2022-01-01
Supplement: d2ma00264g1.pdf [file d2ma00264g1.pdf]

## Supporting Information

### **Black Single Crystals of Lead-free Perovskite Cs<sub>2</sub>Ag(Bi:Ru)Br<sub>6</sub> with Intermediate Band**

*Zehao Zhang<sup>1,+</sup>, Ganghong Liu<sup>1,+</sup>, Wenhui Guo<sup>1,+</sup>, Xiangdong Li<sup>1</sup>, Yuqing Zhang<sup>1</sup>, Cuncun Wu<sup>2</sup>, Bo Qu<sup>1,\*</sup>, Jun-jie Shi<sup>1</sup>, Zhijian Chen<sup>1,\*</sup>, Lixin Xiao<sup>1,\*</sup>*

1. State Key Laboratory for Mesoscopic Physics and Department of Physics, Peking University, Beijing 100871, China
2. School of Materials Science and Engineering, State Key Laboratory of Reliability and Intelligence of Electrical Equipment, Hebei University of Technology, Tianjin 300130, China

**Corresponding Author:** \*bqu@pku.edu.cn, \*zjchen@pku.edu.cn, \*lxxiao@pku.edu.cn

---

## Experimental Methods

*Materials:* CsBr ( $\geq 99.9\%$ ) was obtained from Xi'an Polymer Light Technology Corp(PLT). BiBr<sub>3</sub> ( $\geq 98\%$ ) was purchased from Aldrich. Ruthenium(III) bromide hydrate (Ru 25% min) was purchased from Alfa. AgBr (99.9%) and 48% HBr were purchased from Aladdin. All these commercially available materials were used as received without any further purification.

*Preparation of Cs<sub>2</sub>AgBiBr<sub>6</sub> Crystals (Ru-0):* Solid CsBr (424 mg, 2.0 mmol), BiBr<sub>3</sub> (448 mg, 1.0 mmol) and AgBr (188 mg, 1.0 mmol) were dissolved in 10~12 mL of 48% HBr and then transferred into a 25 mL or 50 mL Teflon-lined autoclave. The autoclave was sealed and placed in the Muffle furnace where it was heated to 120 °C for 24 h. After being slowly cooled to room temperature at a rate of 1 °C h<sup>-1</sup>, red single crystals were obtained. Finally, the crystals were dried.

*Preparation of Cs<sub>2</sub>AgBiBr<sub>6</sub> Crystals with Ru-doping (Ru-x):* x% (molar ratio) BiBr<sub>3</sub> is replaced by equimolar RuBr<sub>3</sub> in the precursor solutions. The synthesis approach is the same as that used for pristine Cs<sub>2</sub>AgBiBr<sub>6</sub>.

*Device Fabrication:* Au electrode was deposited by thermal evaporation at a rate of 0.3 nm s<sup>-1</sup> using a shadow mask to pattern the electrode. The electrode spacing is 0.2 mm.

*Characterization:* UV-visible absorption spectrum was measured by using a UV-vis-NIR spectrophotometer (UV3600 Plus). ICP-OES analysis of the samples was performed by Prodigy 7 (Leeman). PL, excited at 400 nm, was measured with NanoLog infrared fluorescence spectrometer (Nanolog L3-2Ihr). The XRD patterns were measured using X-ray diffraction system (PANalytical Inc.) with monochromatic Cu K $\alpha$  irradiation ( $\lambda = 1.5418 \text{ \AA}$ ). VB-XPS was measured using the X-ray Photoelectron Spectrometer (AXIS Supra, Kratos Analytical Ltd.) The power of the 980 nm laser is 85 mW. The volt-ampere characteristic curve of the device is measured by the probe station (TTPX, LakeShore).

*DFT calculation:* Our first-principles calculations are performed using the projector augmented wave (PAW) method<sup>[1, 2]</sup> as implemented in the Vienna ab initio simulation

package (VASP) code<sup>[3]</sup>. The generalized gradient approximation (GGA) of Perdew-Burke-Ernzerhof (PBE)<sup>[4]</sup> is used for exchange correlation functional. The cutoff energy is set to 500 eV for the plane-wave expansion. The  $7\times 7\times 7$ ,  $11\times 11\times 11$ , and  $13\times 13\times 13$   $\Gamma$ -centered Monkhorst-Pack  $k$ -point meshes are employed for structure optimization, self-consistent calculation, and DOS calculations, respectively. In the calculations of the halide perovskite  $\text{Cs}_2\text{Ag}(\text{Bi}:\text{Ru})\text{Br}_6$ , the convergence tolerance of energy (residual atomic forces) is less than  $10^{-6}$  eV ( $10^{-2}$  eV/Å).

**Table S1.** ICP-OES measurement of crystals powder (molar ratio:Ru/(Ru+Bi))

| Sample | Molar ratio of Ru/(Ru+Bi) in precursor | Cs ( $\mu\text{g/ml}$ ) | Bi ( $\mu\text{g/ml}$ ) | Ru ( $\mu\text{g/ml}$ ) | Molar ratio of Ru/(Ru+Bi) in single crystals |
|--------|----------------------------------------|-------------------------|-------------------------|-------------------------|----------------------------------------------|
| Ru-0.7 | 7:1000                                 | 31.7495                 | 23.8543                 | 0.0003                  | < 0.01%                                      |
| Ru-1   | 1:100                                  | 33.0088                 | 24.6628                 | 0.0357                  | 0.30 %                                       |
| Ru-3   | 3:100                                  | 35.6166                 | 26.4831                 | 0.1390                  | 1.07 %                                       |
| Ru-5   | 1:20                                   | 33.5736                 | 24.3427                 | 0.2217                  | 1.85 %                                       |

**Table S2.** The crystal system and the lattice constants of  $\text{Cs}_2\text{Ag}(\text{Bi}:\text{Ru})\text{Br}_6$ . Here, Exp. and Cal. indicate the results by experiment and calculation, respectively.

| Sample | Crystal System | Lattice Constant (Å) |        |
|--------|----------------|----------------------|--------|
|        |                | Exp.                 | Cal.   |
| Ru-0   | Cubic          | 11.280               | 11.292 |
| Ru-1   | Cubic          | 11.280               | -      |
| Ru-3   | Cubic          | 11.278               | -      |
| Ru-5   | Cubic          | 11.268               | -      |

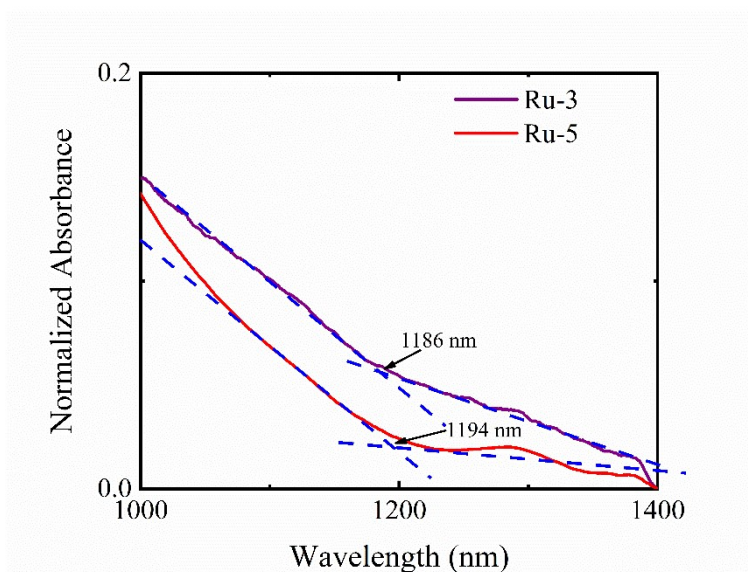

**Figure S1.** Locally amplified absorption spectra of Ru-3 and Ru-5

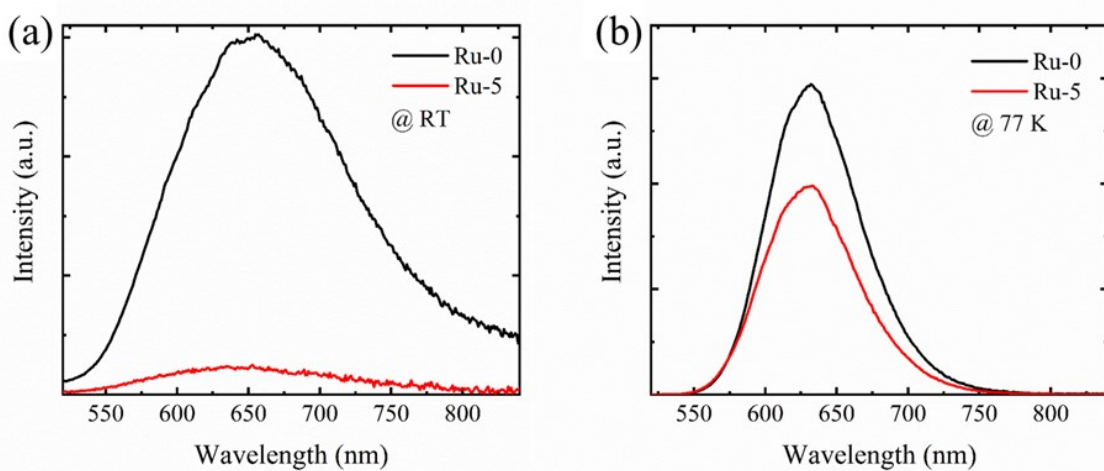

**Figure S2.** The PL (a) in the visible region at room temperature (RT), (b) at 77 K and of Ru-0 and Ru-5 powders.

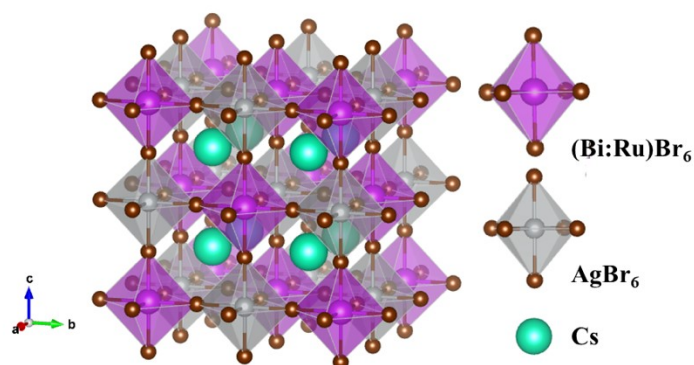

**Figure S3.** The simulated crystal structure of  $\text{Cs}_2\text{Ag}(\text{Bi:Ru})\text{Br}_6$ .

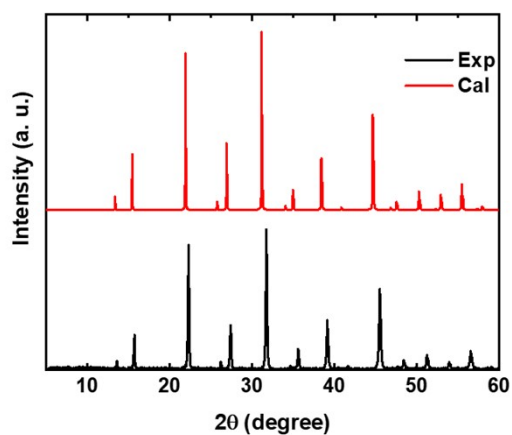

**Figure S4.** The comparison of experimental (Exp) and calculated (Cal) XRD spectrum of  $\text{Cs}_2\text{AgBiBr}_6$ .

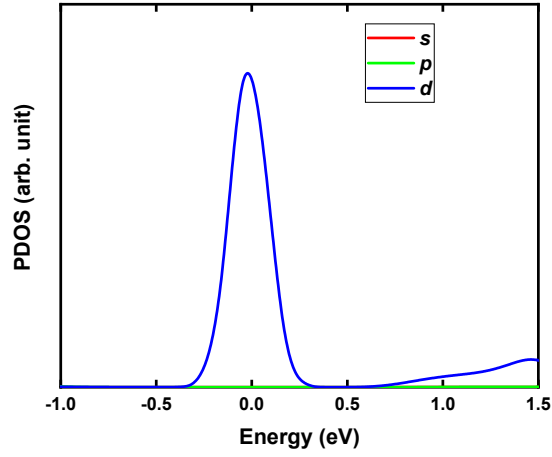

**Figure S5.** The partial density of states of Ru-s/p/d of Ru-25.

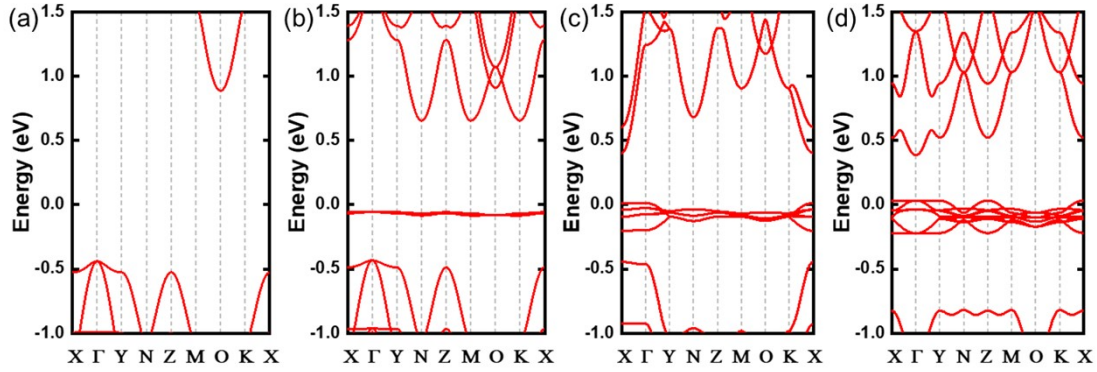

**Figure S6.** The calculated band structures of (a)  $\text{Cs}_2\text{Ag}(\text{Bi}_1\text{Ru}_0)\text{Br}_6$ , (b)  $\text{Cs}_2\text{Ag}(\text{Bi}_{0.75}\text{Ru}_{0.25})\text{Br}_6$ , (c)  $\text{Cs}_2\text{Ag}(\text{Bi}_{0.5}\text{Ru}_{0.5})\text{Br}_6$  and (d)  $\text{Cs}_2\text{Ag}(\text{Bi}_{0.25}\text{Ru}_{0.75})\text{Br}_6$ . Here, the Fermi level is set at 0 eV.

References:

- [1] G. Kresse, D. Joubert, *Physical Review B* **1999**, 59, 1758.
- [2] P. E. Blöchl, *Physical Review B* **1994**, 50, 17953.
- [3] G. Kresse, J. Hafner, *Physical Review B* **1993**, 47, 558.
- [4] J. P. Perdew, K. Burke, M. Ernzerhof, *Physical Review Letters* **1996**, 77, 3865.
